# Supplementary material
Source: publisher figshare collection journal article supplement (https://frontiersin.figshare.com/ndownloader/files/12469532)
Supplement: Supplementary file [file 12469532]

**Supplemental Table 1:** Overall alignment of each metagenome (MG) sample to the metagenome co-assembly. The alignment and number of reads in each sample only includes contigs longer than 5000 bp. Both, the IMG data set and the raw sequences are available for the metagenomes under the JGI project IDs.

| Sample       | Total reads in sample | overall alignment to MG-coassembly (%) | JGI Project ID |
|--------------|-----------------------|----------------------------------------|----------------|
| Forest A001  | 505512939             | 0.0085                                 | 1080879        |
| Forest A1    | 137681004             | 0.0098                                 | 1080881        |
| Forest A01   | 545382676             | 0.0084                                 | 1080880        |
| Forest A10   | 588223706             | 0.0057                                 | 1080882        |
| Forest A100  | 665802098             | 0.0085                                 | 1080883        |
| Pasture A001 | 416868401             | 0.0249                                 | 1080884        |
| Pasture A01  | 552101991             | 0.0231                                 | 1080885        |
| Pasture A10  | 592561540             | 0.0184                                 | 1080886        |
| Pasture A1   | 391519569             | 0.0157                                 | 1080888        |
| Pasture A100 | 447516169             | 0.0151                                 | 1080887        |
